# Supplementary material for: The gas-sensing performance of a core–shell SnO2-based chemiresistive MEMS sensor for H2S detection under vacuum
Source: Royal Society of Chemistry journal article supplement (doi:10.1039/d3tc01940c), 2023-01-01
Supplement: d3tc01940c1.pdf [file d3tc01940c1.pdf]

## Supporting Information

### **Gas-Sensing Performance of Core-shell SnO<sub>2</sub>-based Chemiresistive MEMS Sensor for H<sub>2</sub>S Detection under Vacuum**

*Wenbo Pi<sup>a, ‡</sup>, Xi Chen<sup>a, ‡</sup>, Qiuyun Fu<sup>a</sup>, Zixiao Lu<sup>b</sup>, Honglang Li<sup>b</sup>, Zaiqi Tang<sup>c</sup>, and Wei Luo<sup>\*, a, d</sup>*

*<sup>a</sup>School of Integrated Circuits, Huazhong University of Science and Technology, Wuhan 430074, PR China*

*<sup>b</sup>CAS Center for Excellence in Nanoscience, National Center for Nanoscience and Technology, Beijing 100190, PR China*

*<sup>c</sup>Sysmo Technologies Co., LTD, Beijing 100020, PR China*

*<sup>d</sup>Research Institute of Huazhong University of Science and Technology in Shenzhen, Shenzhen 518000, PR China.*

*<sup>‡</sup>These authors contributed equally to this work.*

*\*E-mail: luowei@mail.hust.edu.cn*

Characterization of silver interdigital electrode  $\text{SnO}_2$  gas sensor after introducing  $\text{H}_2\text{S}$  gas.

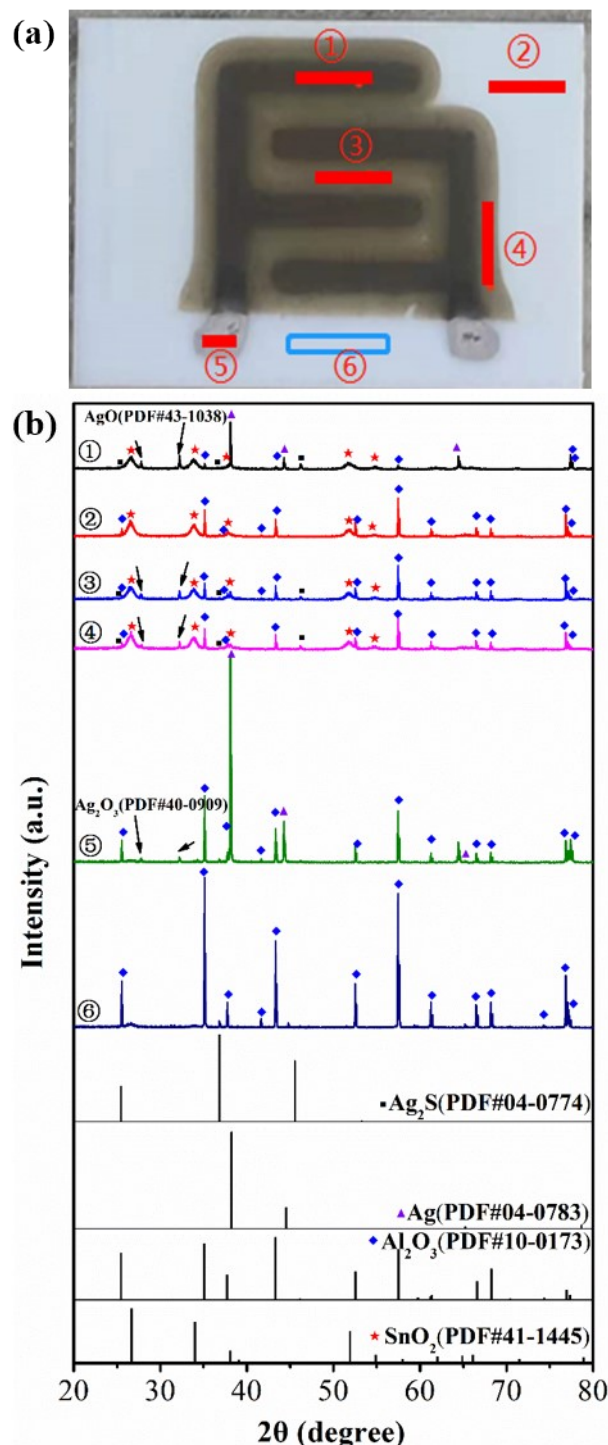

Figure S1. (a) Photo of the silver interdigital electrode  $\text{SnO}_2$  gas sensor after introducing  $\text{H}_2\text{S}$  gas at ambient temperature and pressure, (b) Micro-area XRD pattern of the silver interdigital electrode  $\text{SnO}_2$  gas sensor exposed to  $\text{H}_2\text{S}$  gas.

When 1 ppm of  $\text{H}_2\text{S}$  gas was introduced to the  $\text{SnO}_2$  gas sensor through the silver interdigital electrode, an exponential decrease in the resistance of the  $\text{SnO}_2$  gas sensor was observed. It is noteworthy that after the gas sensing reaction, the  $\text{SnO}_2$  sensitive

film above and around the silver interdigital electrode of the gas sensor turned brownish-yellow, while the color of the  $\text{SnO}_2$  sensitive film away from the silver interdigital electrode remained unchanged, as shown in Figure S1(a). The phase composition of each part of the silver interdigital electrode  $\text{SnO}_2$  gas sensor exposed to  $\text{H}_2\text{S}$  was studied using a micro-area X-ray diffractometer, and the XRD spectrum is shown in Figure S1. The results showed that there were small amounts of  $\text{Ag}_2\text{O}$  and  $\text{Ag}_2\text{S}$  around the Ag electrode, which implied that there were two possible processes for this gas-sensitive reaction: one is the direct reaction between Ag and  $\text{H}_2\text{S}$  gas to generate  $\text{Ag}_2\text{S}$ , another is the reaction between the  $\text{Ag}_2\text{O}$  and  $\text{H}_2\text{S}$ . Both gas-sensitive processes are expected to be applied in the detection of  $\text{H}_2\text{S}$  under low-temperature and high-vacuum conditions.

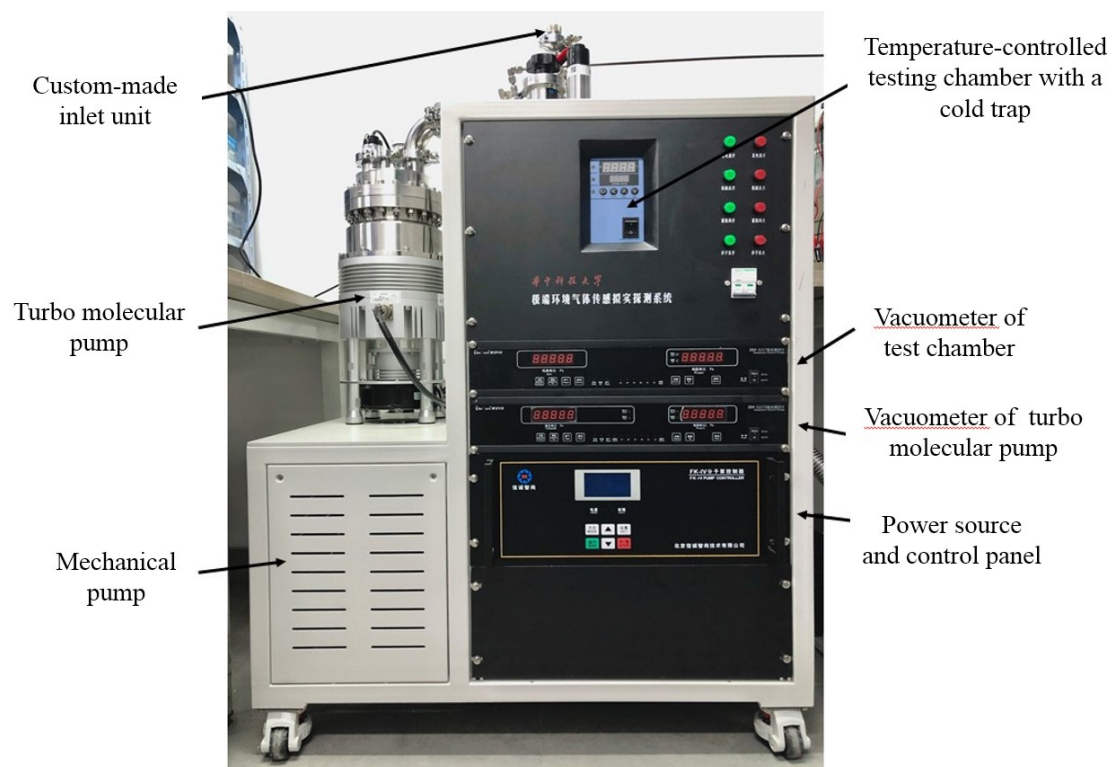

Figure S2. Gas sensor test system under low temperature and high vacuum

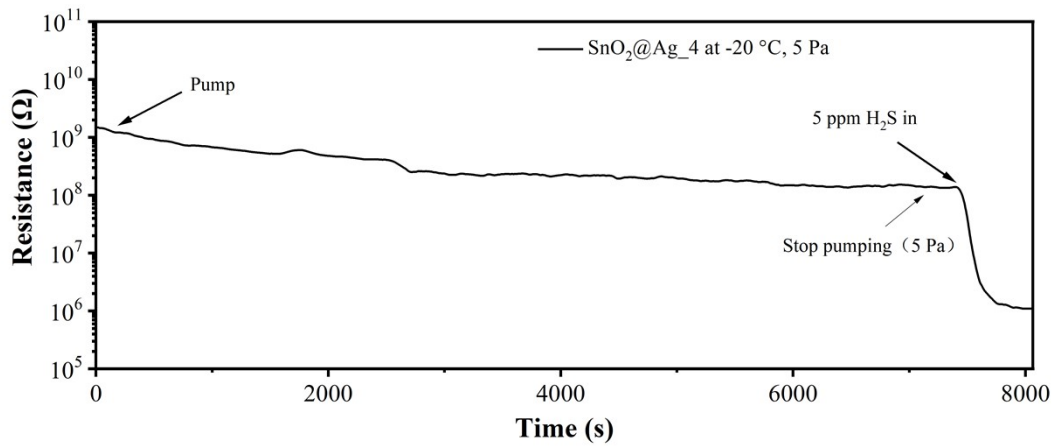

Figure S3. The response curve of SnO<sub>2</sub>@4Ag gas sensor to 5 ppm H<sub>2</sub>S in a low-temperature and low-vacuum condition (-20 °C, 5 Pa)

Then, SnO<sub>2</sub>@4Ag gas sensor was tested for its gas sensing performance towards 5 ppm of H<sub>2</sub>S gas in a low-temperature and low-vacuum test system (-20 °C, 5 Pa). The experimental results, as shown in Figure S3, indicated that upon injecting 5 ppm of H<sub>2</sub>S gas into the system, the resistance of the SnO<sub>2</sub>@4Ag gas sensor immediately decreased, and the response value reached above 100, indicating its capability of detecting H<sub>2</sub>S gas in such a low-temperature and low-vacuum environment (-20 °C, 5 Pa).

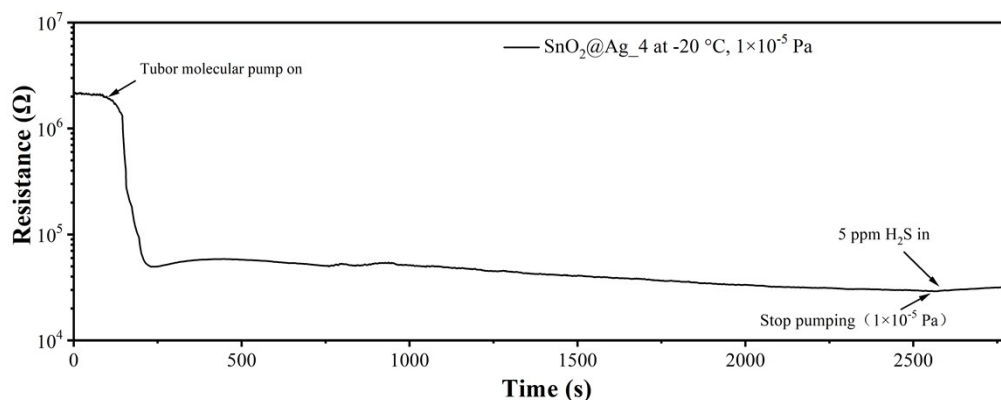

Figure S4. The response curve of  $\text{SnO}_2@\text{Ag}_4$  gas sensor to 5 ppm  $\text{H}_2\text{S}$  in a low-temperature and high-vacuum condition ( $-20^\circ\text{C}$ ,  $1 \times 10^{-5}$  Pa)

As shown in Figure S4, upon injecting 5 ppm of  $\text{H}_2\text{S}$  gas into the test system ( $-20^\circ\text{C}$ ,  $1 \times 10^{-5}$  Pa), the  $\text{SnO}_2@\text{Ag}_4$  gas sensor showed no response, and its resistance only had a slightly increasing trend, which was completely different from the experimental phenomenon observed under low-temperature and low-vacuum conditions.

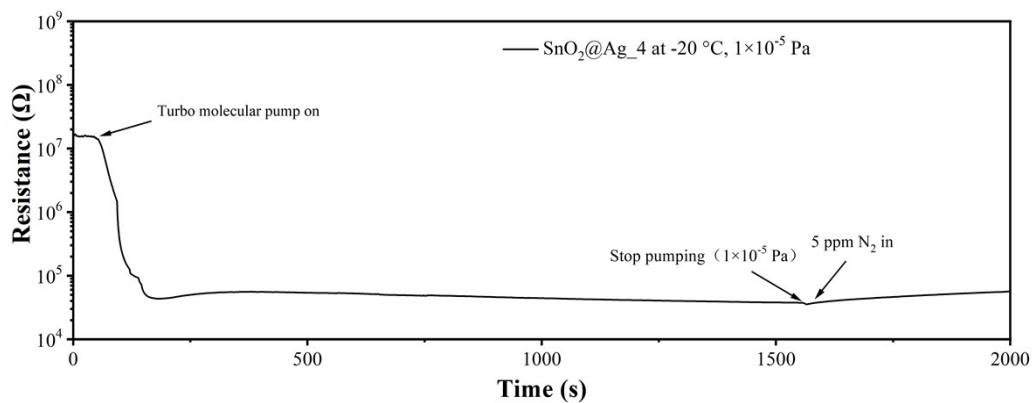

Figure S5. The response curve of SnO<sub>2</sub>@Ag<sub>4</sub> gas sensor to 5 ppm N<sub>2</sub> in a low-temperature and high-vacuum condition (-20 °C, 1×10<sup>-5</sup> Pa)

As shown in Figure S5, upon introducing an equal amount of N<sub>2</sub>, the resistance of the sensor also showed a slightly increasing trend, which was consistent with the experimental phenomenon observed in Figure S4. This indicates that under high-vacuum conditions, SnO<sub>2</sub> and Ag did not react with H<sub>2</sub>S.

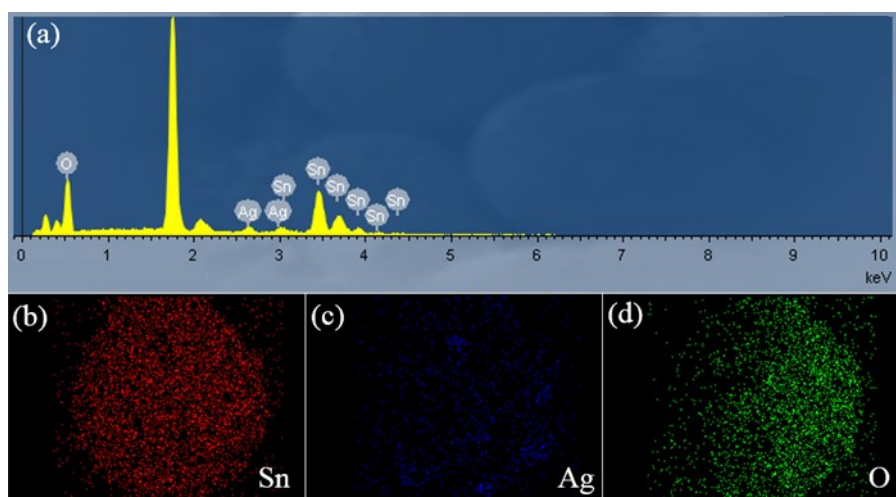

Figure S6. (a) EDS spectra, and (b-d) elemental mapping of  $\text{SnO}_2@\text{Ag}_2\text{O}_2$



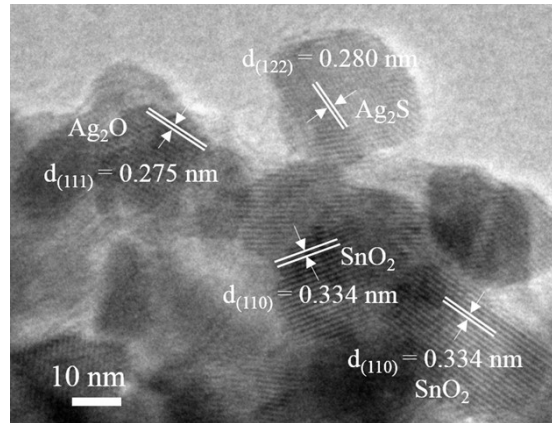

Figure S7. High-resolution TEM image of  $\text{SnO}_2@\text{Ag}_2\text{O}_2$  after exposure to  $\text{H}_2\text{S}$

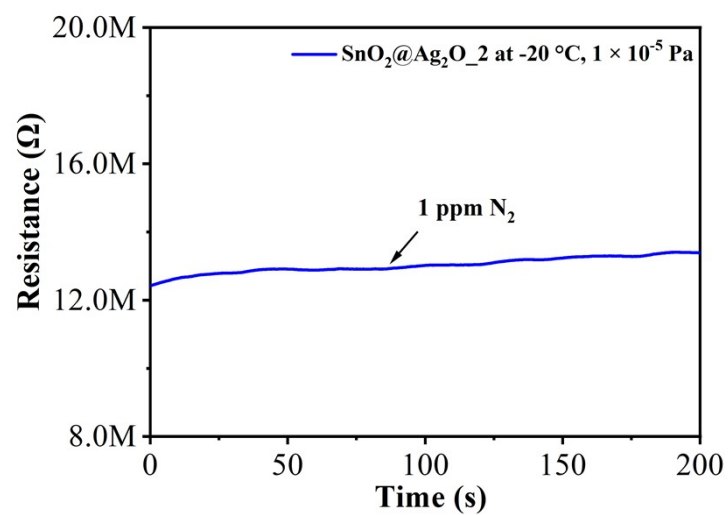

Figure S8. Gas sensing response curve of SnO<sub>2</sub>@Ag<sub>2</sub>O\_2 gas sensor towards with 0.4 mL N<sub>2</sub>

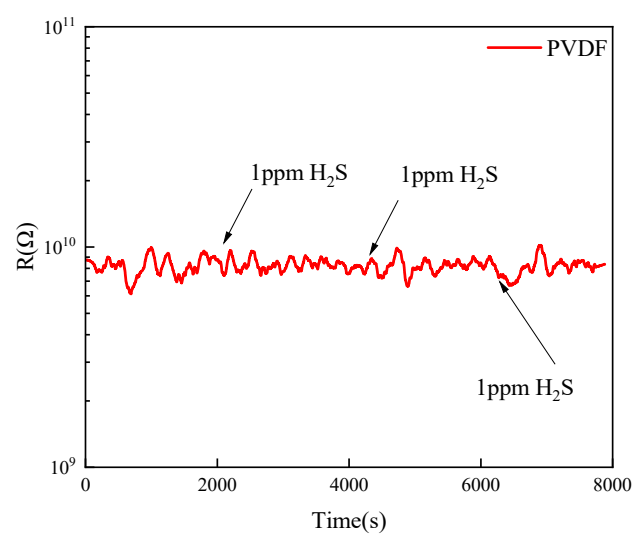

*Figure S9 The PVDF for  $H_2S$  gas detection under vacuum ( $1 \times 10^{-5}$  Pa).*

Table 1

| Method               | Spacecraft Model         | Mass (kg) | Power (W) | Size (cm × cm × cm) | Sensitivity and Limitation                                                                                                               |
|----------------------|--------------------------|-----------|-----------|---------------------|------------------------------------------------------------------------------------------------------------------------------------------|
| Mass Spectrometry    | Phoenix Mars Lander[1]   | 5.7       | 13        | 24 × 23 × 18        | 0.7 to 4, 7–35, 14–70 and 28–140 amu; H <sub>2</sub> O、CO <sub>2</sub> 、H <sub>2</sub> 、O <sub>2</sub> 、NH <sub>3</sub> 、SO <sub>2</sub> |
|                      | Huygens[2]               | 17.3      | 28        | Φ19.8 × 47          | 2 ~ 141 amu                                                                                                                              |
|                      | Pioneer Venus project[3] | 3.81      | 12        | Φ 0.2 × 7.5         | 1-64 amu; CO CO <sub>2</sub> N <sub>2</sub>                                                                                              |
| Visible Spectrometer | LADEE[4]                 | 3.6       | 13        | -                   | Mean noise-equivalent power ~45 R/nm                                                                                                     |
| Our method           |                          | <10g      | <1 W      | 0.5                 | H <sub>2</sub> S, 100 pb                                                                                                                 |

1. *Journal of the American Society for Mass Spectrometry Volume 19, Issue 10, October 2008, Pages 1377-1383*
2. Niemann, H. B., Atreya, S. K., Bauer, S. J., et al. (2003). *The gas chromatograph mass spectrometer for the Huygens probe. In The Cassini-Huygens Mission (pp. 553-591). Dordrecht: Springer Netherlands*
3. Hoffman, J. H., Hodges, R. R., Wright, W. W., et al. (1980). *Pioneer Venus sounder probe neutral gas mass spectrometer. IEEE Transactions on Geoscience and Remote Sensing, 18(1), 80-84.*
4. Elphic, R.C. et al. (2015). *The Lunar Atmosphere and Dust Environment Explorer Mission. In: Elphic, R., Russell, C. (eds) The Lunar Atmosphere and Dust Environment Explorer Mission (LADEE). Springer, Cham. Space Science Reviews*
